# Supplementary material
Source: Springer Nature journal article supplement (https://www.springermedizin.de/resource/supplementary/12879_2012_2294_MOESM1_ESM.pdf/9445490)
Supplement: MOESM1 [file 9445490]

Tale 1

**Bacterial pathogens isolated from the two wards**

| <b>Pathogens</b>                        | <b>NICU<br/>(N = 63)</b> |               | <b>PAED<br/>(N = 268)</b> | <b>TOTAL<br/>(N = 331)</b> |
|-----------------------------------------|--------------------------|---------------|---------------------------|----------------------------|
|                                         | <b>EOS(%)</b>            | <b>LOS(%)</b> | <b>n(%)</b>               | <b>n(%)</b>                |
| <b>Gram positive cocci (GPC)</b>        |                          |               |                           |                            |
| <i>Coagulase Positive Staphylococci</i> | 3(20.0)                  | 5(38.5)       | 20(34.5)                  | 28(32.2)                   |
| <i>Coagulase Negative Staphylococci</i> | 5(33.3)                  | 5(38.5)       | 15(25.9)                  | 25(28.7)                   |
| <i>Streptococcus pneumoniae</i>         | 0(0.0)                   | 0(0.0)        | 1(1.7)                    | 1(1.2)                     |
| <i>β-haemolytic Streptococcus</i>       | 0(0.0)                   | 0(0.0)        | 1(1.7)                    | 1(1.2)                     |
| <b>Gram negative rods (GNR)</b>         |                          |               |                           |                            |
| <i>Klebsiella pneumoniae</i>            | 2(13.3)                  | 0(0.0)        | 4(6.9)                    | 6(6.9)                     |
| <i>Escherichia coli</i>                 | 1(6.7)                   | 1(7.7)        | 4(6.9)                    | 6(6.9)                     |
| <i>Salmonella typhi</i>                 | 0(0.0)                   | 0(0.0)        | 6(10.3)                   | 6(6.9)                     |
| <i>Klebsiella spp</i>                   | 2(13.3)                  | 0(0.0)        | 4(6.9)                    | 6(6.9)                     |
| <i>Pseudomonas aeruginosa</i>           | 0(0.0)                   | 1(7.7)        | 2(3.4)                    | 3(3.5)                     |
| <i>Non-typhoidal Salmonella</i>         | 1(6.7)                   | 0(0.0)        | 1(1.7)                    | 2(2.3)                     |
| <i>Acinetobacter spp</i>                | 1(6.7)                   | 1(7.7)        | 0(0.0)                    | 2(2.3)                     |
| <b>Total isolates</b>                   | <b>15</b>                | <b>13</b>     | <b>58</b>                 | <b>86</b>                  |

**NICU: Neonatal intensive care unit, PAED: Paediatric ward, EOS: Early onset, LOS Late onset**
